# Supplementary material
Source: PubMed Central journal article supplement (PMC2737563)
Supplement: me.2009-0032_1.pdf [file me.2009-0032_1.pdf]

**Supplemental Table I** PCR primers utilised in this study for MR N-terminus and internal deletion fragments.

| <b>Primer name</b> | <b>Direction</b> | <b>Sequence</b>                                   |
|--------------------|------------------|---------------------------------------------------|
| MR 1-82            | Forward          | TTATAG <u>TCGAC</u> GCATGGAGACCAAAGGCTAC          |
| MR 1-82            | Reverse          | TATAA <u>AGCTT</u> CACCCAGGCCGATTATTGT            |
| MR 1-192           | Forward          | TTATAG <u>TCGAC</u> GCATGGAGACCAAAGGCTAC          |
| MR 1-192           | Reverse          | TATAA <u>AGCTT</u> CAAGGGCTGCAAACAGAC             |
| MR 1-300           | Forward          | TTATAG <u>TCGAC</u> GCATGGAGACCAAAGGCTAC          |
| MR 1-300           | Reverse          | TATAA <u>AGCTT</u> CAAGGGCTAGACACAGA              |
| MR 1-393           | Forward          | TTATAG <u>TCGAC</u> GCATGGAGACCAAAGGCTAC          |
| MR 1-393           | Reverse          | TATAA <u>AGCTT</u> CAATTAAGCTGGCCAGTC             |
| MR 1-500           | Forward          | TTATAG <u>TCGAC</u> GCATGGAGACCAAAGGCTAC          |
| MR 1-500           | Reverse          | TATAA <u>AGCTT</u> CAGCTCCCGTCATCTGG              |
| MR 201-597         | Forward          | TTA TAG <u>TCG ACG</u> C AC ATC TTC GGT TTG CAG C |
| MR 201-597         | Reverse          | TAT <u>AAA GCT TCA</u> TTG GTC TCT AGC CGA TCG    |

|                        |         |                                                   |
|------------------------|---------|---------------------------------------------------|
| MR 307-597             | Forward | TTA TAG <u>TCG ACG</u> C AG GTG CTC TGT TTC CAG C |
| MR 307-597             | Reverse | TAT <u>AAA GCT TCA</u> TTG GTC TCT AGC CGA TCG    |
| MR 403-597             | Forward | TTA TAG <u>TCG ACG</u> C GA TGG AGC TTT TAG CAG C |
| MR 403-597             | Reverse | TAT <u>AAA GCT TCA</u> TTG GTC TCT AGC CGA TCG    |
| MR 351-597             | Forward | TTA TAG <u>TCG ACG</u> C GG ATC CAG TAC ATT GCG G |
| MR 351-597             | Reverse | TAT <u>AAA GCT TCA</u> TTG GTC TCT AGC CGA TCG    |
| MR (1-510) +(535-597)  | Forward | CAGAGGCCAGCATCCCTTCCTTATCACGATCGGCTAG             |
| MR (1-510) +(535-597)  | Reverse | CTAGCCGATCGAGATAAGGAAGGGATGCTGGCCTCTG             |
| MR (1-327)+ (382-597)  | Forward | CGCTTTCCAGTCCGGCAGCCAGTGCCATCTCAAATGGTGTG         |
| MR (1-327)+ (382-597)  | Reverse | CACACCATTTGAGATGGCACTGGCTGCCGGACTGGAAAGCG         |
| MR (1-535) + (562-597) | Forward | GTGCTCAAGGTACAATATCTTTATCACACGGCGACCTGTCGTC       |
| MR (1-535) + (562-597) | Reverse | GACGACAGGTCGCCGTGTGATAAAGATATTTGTACCTTGAGCAC      |
| MR (1-381) +(510-597)  | Forward | CTAAGACTGAGGAAGTAGAGTCTGCTATTGTTGGGGTGAATTCAG     |
| MR (1-381) +(510-597)  | Reverse | CTGAATTCACCCCAACAATAGCAGACTCTACTTCCTCAGTCTTAG     |

|                       |         |                                                  |
|-----------------------|---------|--------------------------------------------------|
| MR (1-350) +(543-597) | Forward | GCTACACTGCTTCTGGCACCTCTGCTTCTTTCCAACACCTGAGTTCCT |
| MR (1-350) +(543-597) | Reverse | AGGAACTCAGGTGTTGGAAAGAAGCAGAGGTGCCAGAAGCAGTGTAGC |
| MR (1-327) +(511-597) | Forward | CGCTTTCCAGTCCGGCAGCCTCTGCTATTGGGGTGAATTCAG       |
| MR (1-327) +(511-597) | Reverse | CTGAATTCACCCAACAATAGCAGAGGCTGCCGGACTGGAAAGCG     |
| MR (1-381)+(510-597)  | Forward | CTAAGACTGAGGAAGTAGAGTCACACGGCGACCTGTCGTC         |
| MR (1-381) +(510-597) | Reverse | GACGACAGGTCGCCGTGTGACTCTACTTCCTCAGTCTTAG         |
